# Supplementary material for: Flexible ureteroscopy training for surgeons using isolated porcine kidneys in vitro
Source: Springer Nature journal article supplement (doi:10.1186/s12894-015-0067-9), 2015-07-22
Supplement: MOESM1 [file 9753586]

**Global rating scale**

Please circle the number corresponding to the candidate's performance in each category, irrespective of training level.

|                                        |                                                                                                                         |   |                                                                                                                            |   |                                                                                                                |
|----------------------------------------|-------------------------------------------------------------------------------------------------------------------------|---|----------------------------------------------------------------------------------------------------------------------------|---|----------------------------------------------------------------------------------------------------------------|
| Respect for tissue                     | 1<br>Scope frequently pushed into urothelial wall. Used unnecessary force with guidewire and/or basket                  | 2 | 3<br>Scope occasionally pushed into urothelial wall. Careful handling of guidewire and/or basket for the most part         | 4 | 5<br>No trauma to urothelial wall with scope. Consistent and careful handling of guidewire and/or basket       |
| Time and motion                        | 1<br>Many unnecessary moves                                                                                             | 2 | 3<br>Made some unnecessary moves but time more efficient                                                                   | 4 | 5<br>No unnecessary moves and time is maximized                                                                |
| Instrument handling                    | 1<br>Needed to repeatedly attempt guidewire insertion and/or basketing of stone                                         | 2 | 3<br>Able to insert guidewire and basket stone within first few tries. Occasional awkward maneuver                         | 4 | 5<br>Able to insert guidewire and basket with fluid motion and no awkwardness                                  |
| Handling of endoscope                  | 1<br>Frequently had scope pointing away from the center of the urethra or ureter. Scope poorly aligned during procedure | 2 | 3<br>Had scope centered for the most part. Guidewire in view for the most part. Better use of scope angle during procedure | 4 | 5<br>Scope always centered and guidewire always in view. Scope always set at a good angle throughout procedure |
| Flow of procedure and forward planning | 1<br>Frequently stopped or need advice or assistance from examiner                                                      | 2 | 3<br>Demonstrated the ability to think forward with relatively steady progression of procedure                             | 4 | 5<br>Obviously planned procedure from beginning to end with fluid motion                                       |
| Use of assistants                      | 1<br>Failed to have assistants help with guidewire insertion and/or stone basketing                                     | 2 | 3<br>Appropriate use of assistants most of the time                                                                        | 4 | 5<br>Strategically used assistants to the best advantage at all times                                          |
| Knowledge of procedure                 | 1<br>Deficient knowledge. Needed specific instruction at most operative steps                                           | 2 | 3<br>Knew all important aspects of operation                                                                               | 4 | 5<br>Demonstrated familiarity with all aspects of operation                                                    |

**Pass rating**

Would you feel confident in allowing this trainee to perform this procedure in the operating room?

YES NO
